# Supplementary material for: Impact of a clinical decision support system on paediatric drug dose prescribing: a randomised within-subject simulation trial
Source: HighWire-hosted journal article supplement (doi:10.1136/bmjpo-2022-001726), 2023-01-01
Supplement: bmjpo-2022-001726supp001_data_supplement.pdf [file bmjpo-2022-001726supp001_data_supplement.pdf]

## Supplement 1 – Description of items

| ID | Dosing unit | Indication                            | Active ingredient                | Route of administration | Dose type               | Frequency | Age <sup>a</sup>  | Weight [kg] | Height [cm] | Preterm            |
|----|-------------|---------------------------------------|----------------------------------|-------------------------|-------------------------|-----------|-------------------|-------------|-------------|--------------------|
| 1  | mL/dose     | infection in cystic fibrosis patients | Ciprofloxacin                    | p.o.<br>(liquid)        | -                       | 2x daily  | 6y 10mth          | 26          | -           | no                 |
| 2  | mg/dose     | bacterial infection (severe)          | Vancomycin                       | i.v.                    | -                       | 4x daily  | 5wks <sup>d</sup> | 4.18        | -           | yes –<br>GA 35 2/7 |
| 3  | drops/dose  | epilepsy                              | Clonazepam <sup>b</sup>          | p.o.<br>(liquid)        | loading dose<br>/ begin | 3x daily  | 6y 7mth           | 29          | -           | no                 |
| 4  | mL/dose     | acute otitis media                    | Amoxicillin –<br>Clavulanic acid | p.o.<br>(liquid)        | -                       | 2x daily  | 2y 8mth           | 14          | -           | no                 |
| 5  | mL/dose     | candidiasis (systemic)                | Fluconazole                      | p.o.<br>(liquid)        | -                       | 1x daily  | 8y                | 31          | -           | no                 |
| 6  | mg/dose     | bacterial infection (severe)          | Flucloxacillin                   | i.v.                    | -                       | 3x daily  | 6d                | 3.2         | -           | no                 |

| ID | Dispensing unit | Indication                                                                                                                             | Active ingredient                           | Route of administration | Dose type            | Frequency | Age <sup>a</sup> | Weight [kg] | Height [cm] | Preterm |
|----|-----------------|----------------------------------------------------------------------------------------------------------------------------------------|---------------------------------------------|-------------------------|----------------------|-----------|------------------|-------------|-------------|---------|
| 7  | mg/dose         | nausea and vomiting in chemotherapy                                                                                                    | Dexamethasone dihydrogen phosphate disodium | i.v.                    | -                    | 4x daily  | 1y 6mth          | 12          | 81          | no      |
| 8  | mg/dose         | arthritis                                                                                                                              | Methotrexate <sup>b</sup>                   | s.c.                    | -                    | 1x weekly | 12y 5mth         | 36          | 138         | no      |
| 9  | mL/dose         | prophylaxis of acute rejection in patients with allogenic kidney transplantation (in combination with ciclosporin and corticosteroids) | Mycophenolate mofetil <sup>b</sup>          | p.o. (liquid)           | -                    | 2x daily  | 9y 3mth          | 32          | 122         | no      |
| 10 | mg/dose         | fungal infection (invasive)                                                                                                            | Caspofungin                                 | i.v.                    | loading dose / begin | -         | 11mth            | 9.5         | 76          | no      |
| 11 | mL/dose         | bacterial infection                                                                                                                    | Clarithromycin                              | p.o. (liquid)           | -                    | 2x daily  | 7mth             | 7.6         | -           | no      |
| 12 | mg/dose         | tuberculosis                                                                                                                           | Isoniazid                                   | p.o.                    | -                    | 1x daily  | 10y 7mth         | 38          | -           | no      |

| ID | Dispensing unit | Indication                             | Active ingredient           | Route of administration | Dose type            | Frequency | Age <sup>a</sup>  | Weight [kg] | Height [cm]                            | Preterm         |
|----|-----------------|----------------------------------------|-----------------------------|-------------------------|----------------------|-----------|-------------------|-------------|----------------------------------------|-----------------|
| 13 | mL/dose         | nausea and vomiting in chemotherapy    | Ondansetron                 | p.o. (liquid)           | follow-up treatment  | 3x daily  | 14y 10mth         | 46          | BSA <sup>c</sup> : >1.2 m <sup>2</sup> | no              |
| 14 | mg/dose         | bacterial infection                    | Ceftriaxone                 | i.m.                    | -                    | 1x daily  | 5wks <sup>d</sup> | 3.82        | -                                      | yes – GA 36 5/7 |
| 15 | mL/dose         | pruritus                               | Hydroxyzine dihydrochloride | p.o. (liquid)           | -                    | 3x daily  | 5y 4mth           | 24          | -                                      | no              |
| 16 | mg/dose         | intoxication with benzodiazepines      | Flumazenil                  | i.v.                    | loading dose / begin | -         | 8y 6mth           | 36          | -                                      | no              |
| 17 | mL/dose         | insomnia                               | Chloral hydrate             | p.o. (liquid)           | -                    | 1x daily  | 5y 1mth           | 22          | -                                      | no              |
| 18 | mg/dose         | urolithiasis (urates / urinary stones) | Allopurinol                 | p.o.                    | -                    | 1x daily  | 13y 1mth          | 42          | -                                      | no              |

<sup>a</sup> Age was shown to participants as birthdate calculated on the day of the experiment

<sup>b</sup> Substance with narrow therapeutic window

<sup>c</sup> BSA = body surface area (for this item the BSA was provided for the SmPC user as the dosing information differentiated between BSA >1.2 m<sup>2</sup> or <1.2 m<sup>2</sup>)

<sup>d</sup> corrected age
