# Supplementary material for: Impact of a clinical decision support system on paediatric drug dose prescribing: a randomised within-subject simulation trial
Source: HighWire-hosted journal article supplement (doi:10.1136/bmjpo-2022-001726), 2023-01-01
Supplement: bmjpo-2022-001726supp002_data_supplement.pdf [file bmjpo-2022-001726supp002_data_supplement.pdf]

## Supplement 2 – Example of the structured dosing information of PDeDose

| Substance                                                              |         | Vancomycin                  |             |              |               |                       |                     |                |                                                                                    |     |     |
|------------------------------------------------------------------------|---------|-----------------------------|-------------|--------------|---------------|-----------------------|---------------------|----------------|------------------------------------------------------------------------------------|-----|-----|
| Indication                                                             |         | bacterial infection, severe |             |              |               |                       |                     |                |                                                                                    |     |     |
| Route of administration                                                |         | IV, parenteral              |             |              |               |                       |                     |                |                                                                                    |     |     |
| Calculated dose                                                        |         |                             |             |              |               |                       |                     |                |                                                                                    |     |     |
| Age                                                                    | Weight  | PI                          | Application | Type of dose | Dose          | Number of repetitions | Max individual dose | Max daily dose | Remarks                                                                            | GR  | Ref |
| 5 wk                                                                   | 4.18 kg |                             | IV          |              | 63 mg/dose    | 4 x daily             |                     |                | by inf                                                                             | B   |     |
| You must enter the height to be able to calculate the BMI.             |         |                             |             |              |               |                       |                     |                |                                                                                    |     |     |
| 6 Products in Switzerland matching the data set of the calculated dose |         |                             |             |              |               |                       |                     |                |                                                                                    |     |     |
| General doses                                                          |         |                             |             |              |               |                       |                     |                |                                                                                    |     |     |
| Age/PMA                                                                | Weight  | PI                          | Application | Type of dose | Dose          | Number of repetitions | Max individual dose | Max daily dose | Remarks                                                                            | GR  | Ref |
| < 30 wk                                                                |         | PI                          | IV          | loading dose | 25 mg/kg/dose |                       |                     |                | as a single dose, start the maintenance dosage 24 h after the loading dose; by inf | D   |     |
| < 30 wk                                                                |         | PI                          | IV          | maintenance  | 20 mg/kg/dose | 1 x daily             |                     |                | first maintenance dose 24 h after the loading dose; by inf                         | D   |     |
| 30 wk - 34 wk                                                          |         | PI                          | IV          | loading dose | 25 mg/kg/dose |                       |                     |                | as a single dose, start the maintenance dosage 18 h after the loading dose; by inf | D   |     |
| 30 wk - 34 wk                                                          |         | PI                          | IV          | maintenance  | 20 mg/kg/dose | every 18 h            |                     |                | first maintenance dose 18 h after the loading dose; by inf                         | D   |     |
| 34 wk - 38 wk                                                          |         | PI                          | IV          | loading dose | 25 mg/kg/dose |                       |                     |                | as a single dose, start the maintenance dosage 12 h after the loading dose; by inf | D   |     |
| 34 wk - 38 wk                                                          |         | PI                          | IV          | maintenance  | 20 mg/kg/dose | 2 x daily             |                     |                | first maintenance dose 12 h after the loading dose; by inf                         | D   |     |
| 38 wk - 40 wk                                                          |         | PI                          | IV          | loading dose | 25 mg/kg/dose |                       |                     |                | as a single dose, start the maintenance dosage 8 h after the loading dose; by inf  | D   |     |
| 38 wk - 40 wk                                                          |         | PI                          | IV          | maintenance  | 15 mg/kg/dose | 3 x daily             |                     |                | first maintenance dose 8 h after the loading dose; by inf                          | D   |     |
| 0 D - 28 D                                                             |         |                             | IV          | loading dose | 25 mg/kg/dose |                       |                     |                | as a single dose, start the maintenance dosage 8 h after the loading dose; by inf  | D   |     |
| 0 D - 28 D                                                             |         |                             | IV          | maintenance  | 15 mg/kg/dose | 3 x daily             |                     |                | first maintenance dose 8 h after the loading dose; by inf (A)                      | (A) |     |
| 28 D - 18 Y and < 66 kg                                                |         |                             | IV          |              | 15 mg/kg/dose | 4 x daily             |                     |                | by inf                                                                             | B   |     |
| < 18 Y and ≥ 66 kg                                                     |         |                             | IV          |              | 1 000 mg/dose | 4 x daily             |                     |                | by inf                                                                             | B   |     |

**Figure:** Example of the vancomycin dosage information for severe bacterial infection to be administered intravenously. In the calculated dosage tab one can see the calculated dosage for a hypothetical preterm of 5 weeks of age (corrected age) with a weight of 4.18 kg analogous to item number 2 of the trial. In the general doses tab the basic dosing information can be seen.
