# Supplementary material for: Impact of a clinical decision support system on paediatric drug dose prescribing: a randomised within-subject simulation trial
Source: HighWire-hosted journal article supplement (doi:10.1136/bmjpo-2022-001726), 2023-01-01
Supplement: bmjpo-2022-001726supp003_data_supplement.pdf [file bmjpo-2022-001726supp003_data_supplement.pdf]

### Supplement 3 – Sample size estimation

#### Expected power for significant improvement of the CDSS PDeDose vs no CDSS

Error rate without CDSS: 20%

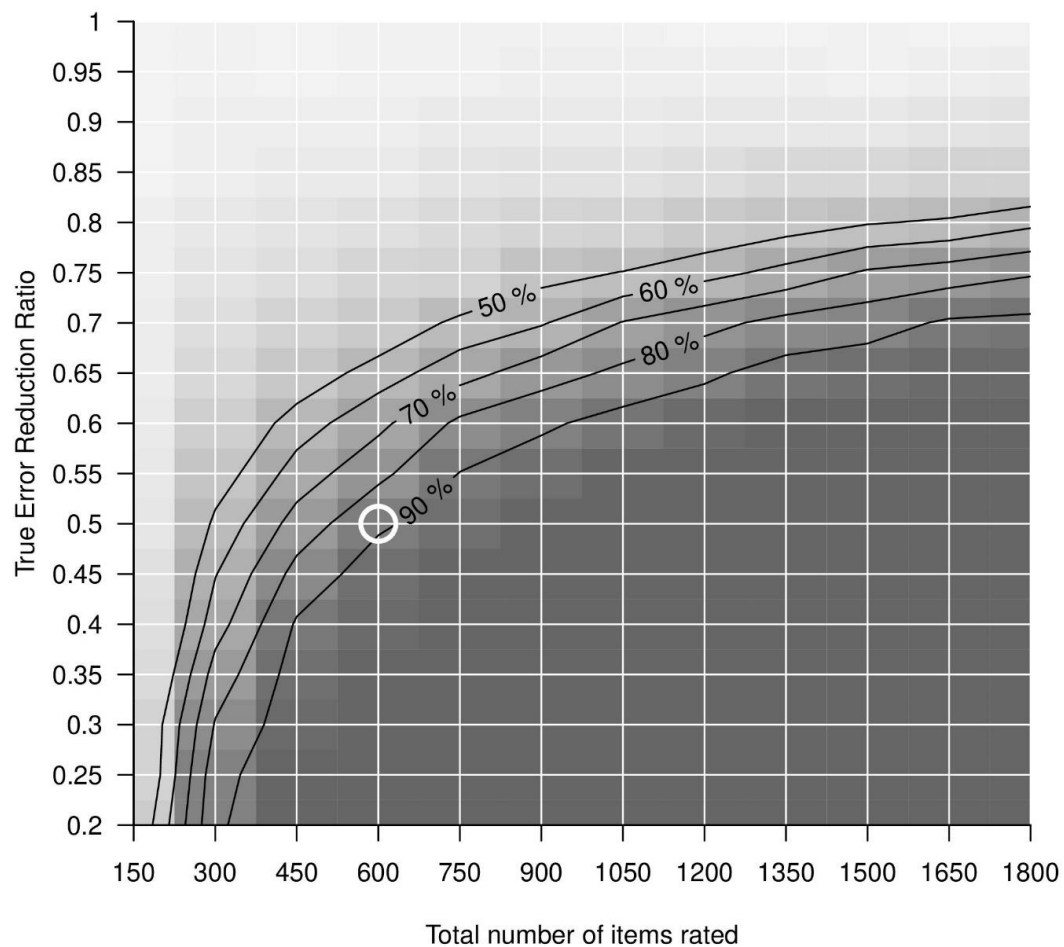

**Figure:** The experiment was simulated 999 times assuming between 150 to 1800 items that are rated, while achieving an error reduction ratio between 0.2 to 1 (no reduction). The white circle marks the estimated number of items that need to be rated to achieve a 50% error reduction.
