# Supplementary material for: Impact of a clinical decision support system on paediatric drug dose prescribing: a randomised within-subject simulation trial
Source: HighWire-hosted journal article supplement (doi:10.1136/bmjpo-2022-001726), 2023-01-01
Supplement: bmjpo-2022-001726supp004_data_supplement.pdf [file bmjpo-2022-001726supp004_data_supplement.pdf]

## Supplement 4 - Statistical analyses

### Contents

|                                                       |           |
|-------------------------------------------------------|-----------|
| <b>Confirmatory analysis</b>                          | <b>2</b>  |
| Errors (full model) . . . . .                         | 2         |
| Errors (simple model) . . . . .                       | 4         |
| Time (full model) . . . . .                           | 6         |
| Time (simple model) . . . . .                         | 8         |
| <b>Exploratory analysis</b>                           | <b>10</b> |
| Errors (full model) . . . . .                         | 10        |
| Errors (simple model) . . . . .                       | 12        |
| Time (full model) . . . . .                           | 14        |
| Time (simple model) . . . . .                         | 16        |
| Sensitivity analysis . . . . .                        | 18        |
| <b>Contrasts</b>                                      | <b>19</b> |
| Contrast matrices for categorical variables . . . . . | 19        |

## CONFIRMATORY ANALYSIS

**Confirmatory analysis****Errors (full model)****Results**

| Variable                          | OR   | CI (low) | CI (high) | p value |
|-----------------------------------|------|----------|-----------|---------|
| Intervention                      | 0.08 | 0.02     | 0.36      | <0.001  |
| Institution (Children's hospital) | 1.27 | 0.75     | 2.15      | 0.3823  |
| Institution (Hospital)            | 1.12 | 0.74     | 1.70      | 0.5875  |
| User (partly vs no)               | 0.57 | 0.26     | 1.29      | 0.1779  |
| User (yes vs partly)              | 0.88 | 0.37     | 2.11      | 0.7712  |

**R summary output**

```
## Generalized linear mixed model fit by maximum likelihood (Laplace
## Approximation) [glmerMod]
## Family: binomial ( logit )
## Formula:
## error ~ intervention + institution + user + (intervention | subject) +
## (intervention | item)
## Data: data_confirmatory
## Control: glmerControl(optimizer = "bobyqa")
##
##      AIC      BIC   logLik deviance df.resid
##  457.2   510.4  -216.6   433.2     608
##
## Scaled residuals:
##      Min       1Q   Median       3Q      Max
## -0.8811 -0.4334 -0.2101 -0.1185  3.7005
##
## Random effects:
## Groups Name          Variance Std.Dev. Corr
## subject (Intercept)    0.2340   0.4838
##      interventionfull  1.4835   1.2180  -0.51
## item (Intercept)       0.2954   0.5435
##      interventionfull  0.7559   0.8694  -0.35
## Number of obs: 620, groups: subject, 52; item, 18
##
## Fixed effects:
##              Estimate Std. Error z value Pr(>|z|)
## (Intercept)   -1.4938    0.2415  -6.187 6.15e-10 ***
## interventionfull -2.4694    0.7395  -3.339 0.000839 ***
## institution1     0.2359    0.2700   0.874 0.382263
## institution2     0.1151    0.2121   0.543 0.587464
## userpartly-no   -0.5563    0.4129  -1.347 0.177867
## useryes-partly  -0.1302    0.4478  -0.291 0.771219
## ---
## Signif. codes:  0 '***' 0.001 '**' 0.01 '*' 0.05 '.' 0.1 ' ' 1
##
## Correlation of Fixed Effects:
```

Errors (full model)

CONFIRMATORY ANALYSIS

```
##          (Intr) intrvn instt1 instt2 usrpr-  
## intrvntnfl1 -0.252  
## institutin1 -0.139 -0.091  
## institutin2 -0.137  0.034 -0.404  
## userprtly-n  0.238  0.040 -0.297  0.165  
## usrys-prtly -0.129  0.144 -0.390  0.164 -0.467
```

**Plot - Predicted probability of error**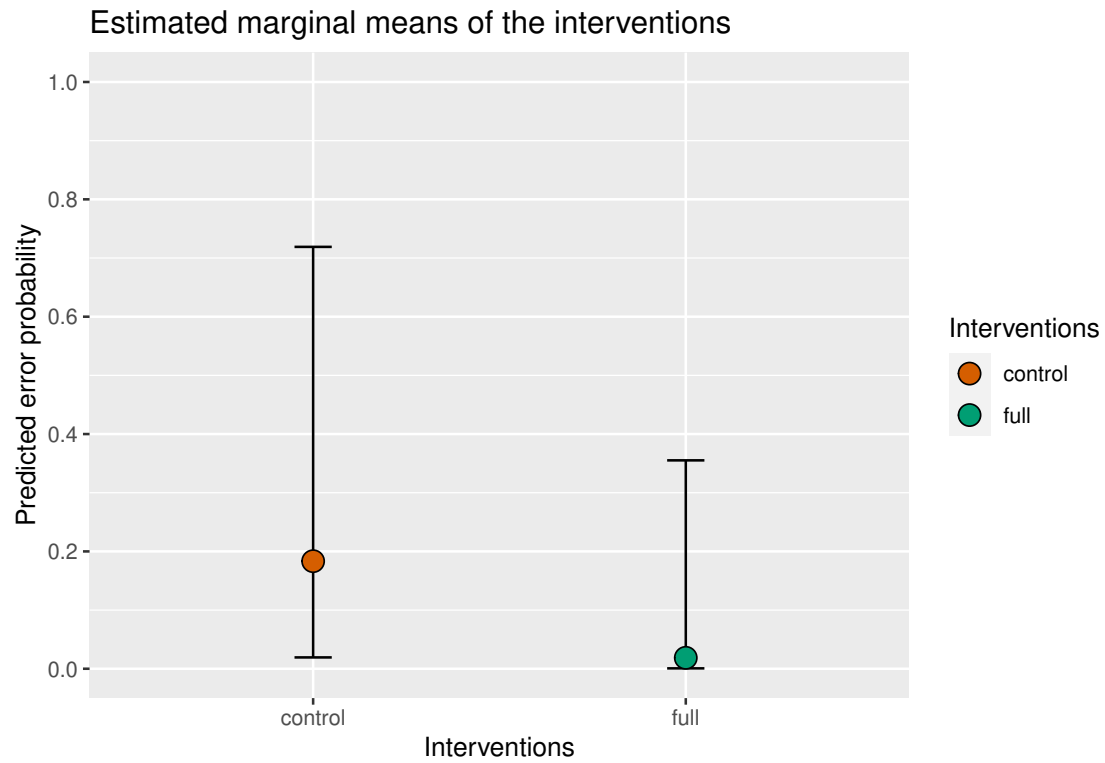

Errors (simple model)

CONFIRMATORY ANALYSIS

**Errors (simple model)****Results**

| Variable     | OR   | CI (low) | CI (high) | p value |
|--------------|------|----------|-----------|---------|
| Intervention | 0.15 | 0.08     | 0.27      | <0.001  |

**R summary output**

```
## Generalized linear mixed model fit by maximum likelihood (Laplace
## Approximation) [glmerMod]
## Family: binomial ( logit )
## Formula: error ~ intervention + (1 | subject) + (1 | item)
## Data: data_confirmatory
## Control: glmerControl(optimizer = "bobyqa")
##
##      AIC      BIC  logLik deviance df.resid
## 447.0    464.8  -219.5   439.0     616
##
## Scaled residuals:
##      Min       1Q   Median       3Q      Max
## -0.8104 -0.4473 -0.2367 -0.1683  5.8528
##
## Random effects:
## Groups Name      Variance Std.Dev.
## subject (Intercept) 0.2236   0.4728
## item (Intercept) 0.2925   0.5408
## Number of obs: 620, groups: subject, 52; item, 18
##
## Fixed effects:
##              Estimate Std. Error z value Pr(>|z|)
## (Intercept)    -1.3756    0.2165  -6.355 2.09e-10 ***
## interventionfull -1.9200    0.3183  -6.032 1.62e-09 ***
## ---
## Signif. codes:  0 '***' 0.001 '**' 0.01 '*' 0.05 '.' 0.1 ' ' 1
##
## Correlation of Fixed Effects:
##              (Intr)
## intrvntnfl1 -0.242
```

Errors (simple model)

CONFIRMATORY ANALYSIS

## Plot - Predicted probability of error

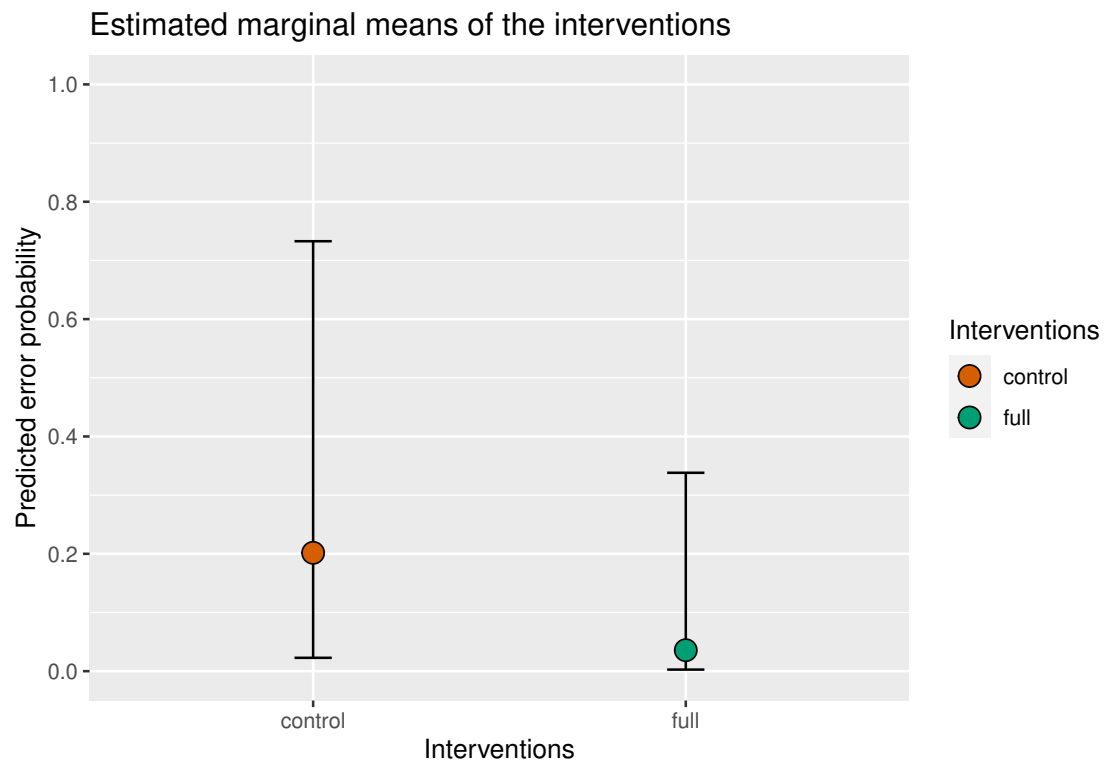

Time (full model)

CONFIRMATORY ANALYSIS

**Time (full model)****Results**

| Variable                          | Deviation (%) | CI (low) | CI (high) | p value |
|-----------------------------------|---------------|----------|-----------|---------|
| Intervention                      | -44.85        | -50.51   | -38.54    | <0.001  |
| Institution (Children's hospital) | -17.78        | -26.16   | -8.46     | <0.001  |
| Institution (Hospital)            | 2.60          | -6.37    | 12.42     | 0.5853  |
| Experience (5-10y vs <5y)         | 2.64          | -10.99   | 18.36     | 0.7217  |
| Experience (>10y vs 5-10y)        | -1.39         | -15.75   | 15.40     | 0.8619  |
| User (partly vs no)               | 6.34          | -9.92    | 25.52     | 0.4717  |
| User (yes vs partly)              | -7.73         | -22.11   | 9.30      | 0.3568  |

**R summary output**

```
## Linear mixed model fit by REML. t-tests use Satterthwaite's method [
## lmerModLmerTest]
## Formula:
## log_time ~ intervention + institution + experience + user + (intervention |
##   subject) + (intervention | item)
##   Data: data_confirmatory
##
## REML criterion at convergence: 432.7
##
## Scaled residuals:
##   Min      1Q  Median      3Q      Max
## -3.4708 -0.6145 -0.0595  0.5344  3.1635
##
## Random effects:
##   Groups   Name                Variance Std.Dev. Corr
##   subject (Intercept)          0.04406  0.2099
##           interventionfull 0.05292  0.2300  -0.35
##   item    (Intercept)          0.06619  0.2573
##           interventionfull 0.02677  0.1636  -0.91
##   Residual                    0.08039  0.2835
## Number of obs: 618, groups:  subject, 52; item, 18
##
## Fixed effects:
##              Estimate Std. Error    df t value Pr(>|t|)
## (Intercept)    5.12111    0.07072 26.21325  72.415 < 2e-16 ***
## interventionfull -0.59507    0.05524 30.37710 -10.773 6.74e-12 ***
## institution1    -0.19580    0.05480 44.96048  -3.573 0.000856 ***
## institution2     0.02564    0.04665 44.84160   0.550 0.585265
## experience5-10y-<5y 0.02606    0.07269 44.77178   0.359 0.721652
## experience>10y-5-10y -0.01404    0.08025 44.96372  -0.175 0.861888
## userpartly-no    0.06144    0.08463 44.84683   0.726 0.471654
## useryes-partly  -0.08049    0.08645 45.06018  -0.931 0.356777
## ---
## Signif. codes:  0 '***' 0.001 '**' 0.01 '*' 0.05 '.' 0.1 ' ' 1
##
## Correlation of Fixed Effects:
##              (Intr) intrvn instt1 instt2 e5-10- e>10-5 usrpr-
```

Time (full model)

CONFIRMATORY ANALYSIS

```
## intrvntnfl1 -0.698
## institutin1 -0.071 -0.001
## institutin2 -0.064 0.000 -0.412
## expr5-10-<5 0.039 -0.002 -0.027 -0.311
## exp>10-5-10 0.062 0.000 0.159 0.035 -0.442
## userprtly-n 0.114 0.002 -0.292 0.199 -0.043 -0.047
## usry-sprtly -0.073 -0.001 -0.375 0.134 0.000 0.007 -0.466
```

**Plot - Predicted response time**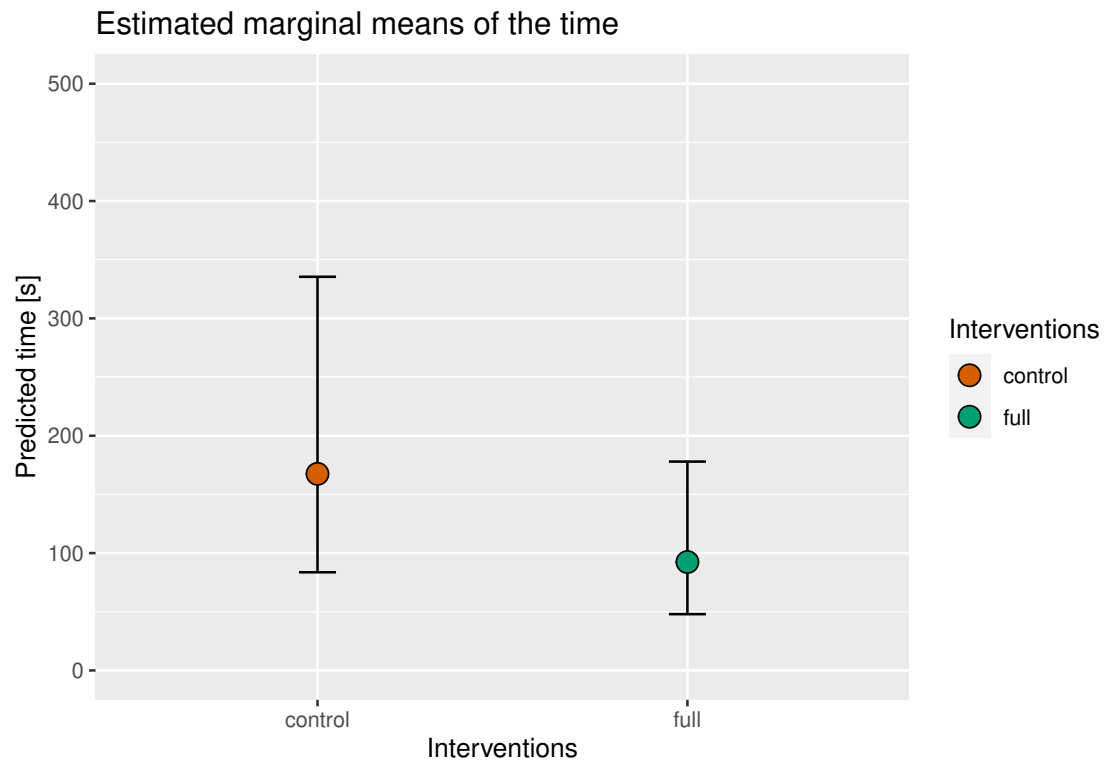

*Time (simple model)*

CONFIRMATORY ANALYSIS

**Time (simple model)****Results**

| Variable     | Deviation (%) | CI (low) | CI (high) | p value |
|--------------|---------------|----------|-----------|---------|
| Intervention | -45           | -47.73   | -42.12    | <0.001  |

**R summary output**

```
## Linear mixed model fit by REML. t-tests use Satterthwaite's method [
## lmerModLmerTest]
## Formula: log_time ~ intervention + (1 | subject) + (1 | item)
## Data: data_confirmatory
##
## REML criterion at convergence: 494.8
##
## Scaled residuals:
##   Min       1Q   Median       3Q      Max
## -4.0767 -0.6149 -0.0248  0.5679  3.3763
##
## Random effects:
## Groups Name          Variance Std.Dev.
## subject (Intercept) 0.05797  0.2408
## item    (Intercept) 0.03607  0.1899
## Residual                0.10085  0.3176
## Number of obs: 618, groups: subject, 52; item, 18
##
## Fixed effects:
##              Estimate Std. Error    df t value Pr(>|t|)
## (Intercept)    5.07975    0.05877 38.59148  86.44 <2e-16 ***
## interventionfull -0.59777    0.02604 551.44043 -22.95 <2e-16 ***
## ---
## Signif. codes:  0 '***' 0.001 '**' 0.01 '*' 0.05 '.' 0.1 ' ' 1
##
## Correlation of Fixed Effects:
##              (Intr)
## intrvntnfl1 -0.222
```



Time (simple model)

CONFIRMATORY ANALYSIS

Plot - Predicted response time

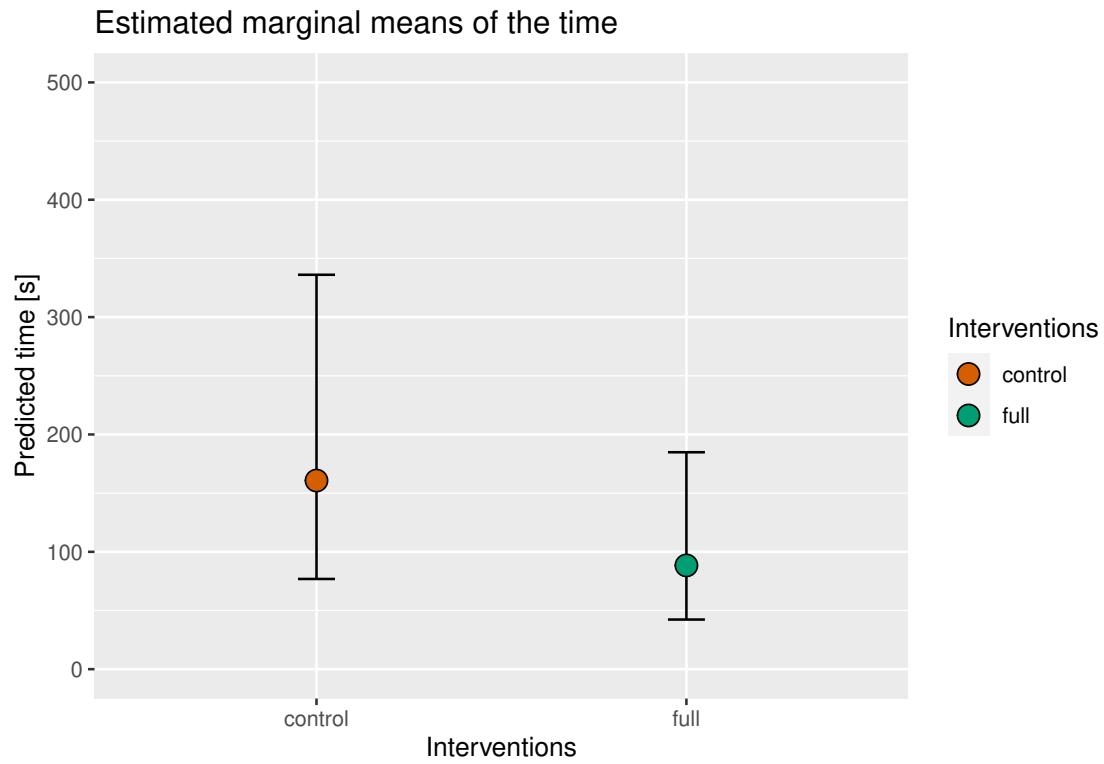

## EXPLORATORY ANALYSIS

**Exploratory analysis****Errors (full model)****Results**

| Variable                          | OR   | CI (low) | CI (high) | p value |
|-----------------------------------|------|----------|-----------|---------|
| Intervention (basic vs control)   | 0.67 | 0.44     | 1.03      | 0.0677  |
| Intervention (full vs basic)      | 0.22 | 0.12     | 0.42      | <0.001  |
| Institution (Children's hospital) | 1.37 | 0.90     | 2.08      | 0.1428  |
| Institution (Hospital)            | 0.97 | 0.68     | 1.38      | 0.8601  |
| Experience (5-10y vs <5y)         | 1.36 | 0.79     | 2.36      | 0.2725  |
| Experience (>10y vs 5-10y)        | 1.15 | 0.64     | 2.05      | 0.6443  |
| User (partly vs no)               | 0.51 | 0.26     | 1.00      | 0.0498  |
| User (yes vs partly)              | 1.33 | 0.68     | 2.62      | 0.4019  |

**R summary output**

```
## Generalized linear mixed model fit by maximum likelihood (Laplace
## Approximation) [glmerMod]
## Family: binomial ( logit )
## Formula: error ~ intervention + institution + experience + user + (1 |
## subject) + (1 | item)
## Data: data_exploratory
## Control: glmerControl(optimizer = "bobyqa")
##
##      AIC      BIC  logLik deviance df.resid
##  711.6   764.9  -344.8   689.6     921
##
## Scaled residuals:
##      Min       1Q   Median       3Q      Max
## -1.0078 -0.4323 -0.2991 -0.1736  6.2086
##
## Random effects:
## Groups Name          Variance Std.Dev.
## subject (Intercept) 0.1555   0.3943
## item (Intercept)    0.3354   0.5791
## Number of obs: 932, groups: subject, 52; item, 18
##
## Fixed effects:
##              Estimate Std. Error z value Pr(>|z|)
## (Intercept)    -2.26943    0.21046 -10.783 < 2e-16 ***
## interventionbasic-control -0.39394    0.21565  -1.827  0.0677 .
## interventionfull-basic  -1.49297    0.31775  -4.699 2.62e-06 ***
## institution1         0.31265    0.21334   1.466  0.1428
## institution2        -0.03148    0.17857  -0.176  0.8601
## experience5-10y-<5y    0.30767    0.28040   1.097  0.2725
## experience>10y-5-10y  0.13731    0.29742   0.462  0.6443
## userpartly-no        -0.67513    0.34415  -1.962  0.0498 *
## useryes-partly       0.28866    0.34439   0.838  0.4019
## ---
```

Errors (full model)

EXPLORATORY ANALYSIS

```
## Signif. codes:  0 '***' 0.001 '**' 0.01 '*' 0.05 '.' 0.1 ' ' 1
##
## Correlation of Fixed Effects:
##      (Intr) intrvntnb- intrvntnf- instt1 instt2 e5-10- e>10-5 usrpr-
## intrvntnbs-  0.043
## intrvntnfl-  0.277 -0.374
## institutin1 -0.173 -0.002    -0.010
## institutin2 -0.098 -0.006    -0.005   -0.345
## expr5-10-<5  0.019  0.000    -0.010   -0.042  -0.314
## exp>10-5-10 0.061 -0.004    0.005    0.146  0.070 -0.431
## userprtly-n  0.239  0.007    0.007   -0.312  0.178 -0.039 -0.037
## usrys-prtly -0.137 -0.009    0.002   -0.324  0.113  0.023  0.025 -0.529
```

## Plot - Predicted probability of error

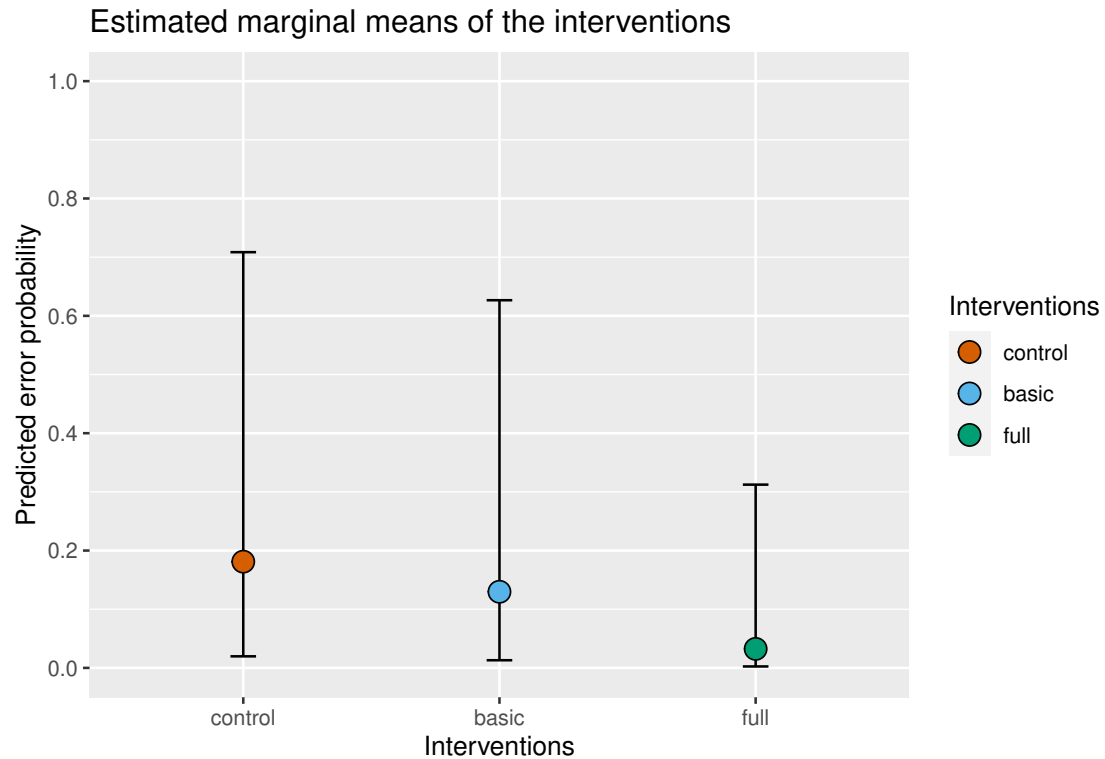

Errors (simple model)

EXPLORATORY ANALYSIS

**Errors (simple model)****Results**

| Variable                        | OR   | CI (low) | CI (high) | p value |
|---------------------------------|------|----------|-----------|---------|
| Intervention (basic vs control) | 0.67 | 0.44     | 1.02      | 0.0629  |
| Intervention (full vs basic)    | 0.22 | 0.12     | 0.41      | <0.001  |

**R summary output**

```
## Generalized linear mixed model fit by maximum likelihood (Laplace
## Approximation) [glmerMod]
## Family: binomial ( logit )
## Formula: error ~ intervention + (1 | subject) + (1 | item)
## Data: data_exploratory
## Control: glmerControl(optimizer = "bobyqa")
##
##      AIC      BIC  logLik deviance df.resid
##  706.8    731.0  -348.4   696.8     927
##
## Scaled residuals:
##      Min       1Q   Median       3Q      Max
## -0.9847 -0.4297 -0.3089 -0.1722  5.7553
##
## Random effects:
##  Groups Name      Variance Std.Dev.
##  subject (Intercept) 0.2545   0.5044
##  item (Intercept) 0.3500   0.5916
## Number of obs: 932, groups: subject, 52; item, 18
##
## Fixed effects:
##              Estimate Std. Error z value Pr(>|z|)
## (Intercept)      -2.1927    0.2047 -10.710 < 2e-16 ***
## interventionbasic-control -0.3994    0.2148  -1.860  0.0629 .
## interventionfull-basic  -1.5014    0.3169  -4.738 2.16e-06 ***
## ---
## Signif. codes:  0 '***' 0.001 '**' 0.01 '*' 0.05 '.' 0.1 ' ' 1
##
## Correlation of Fixed Effects:
##      (Intr) intrvntnb-
## intrvntnbs-  0.044
## intrvntnfl-  0.282 -0.375
```

Errors (simple model)

EXPLORATORY ANALYSIS

## Plot - Predicted probability of error

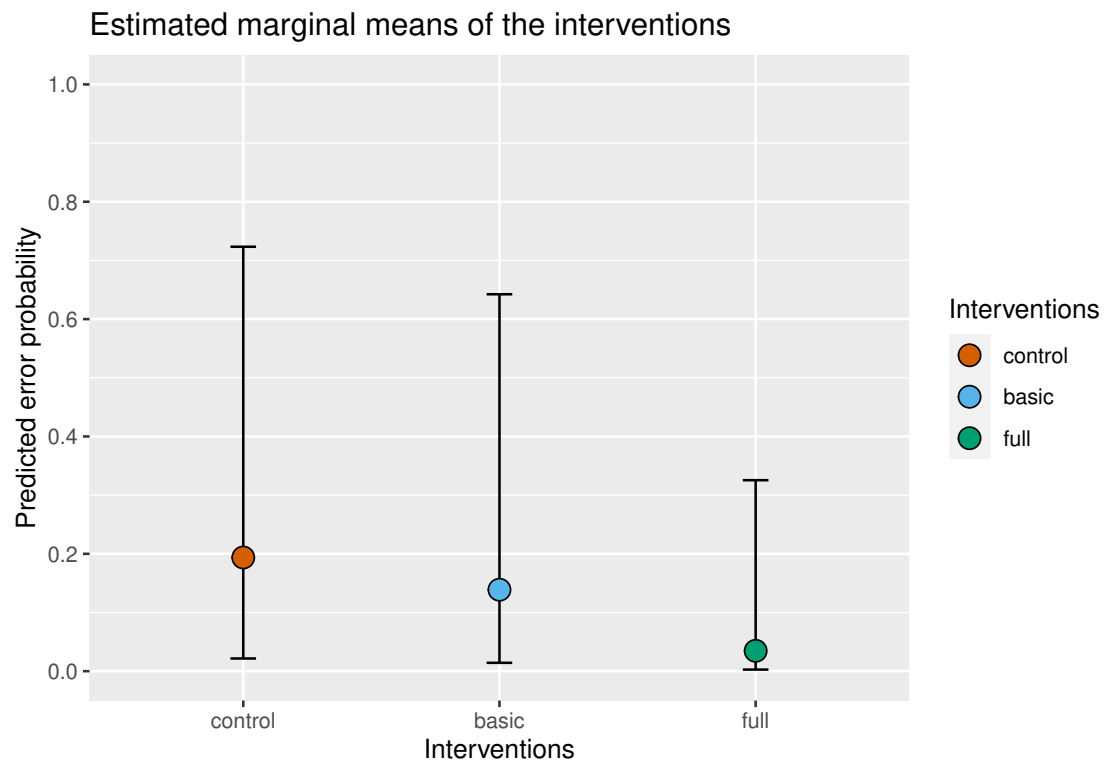

Time (full model)

EXPLORATORY ANALYSIS

**Time (full model)****Results**

| Variable                          | Deviation (%) | CI (low) | CI (high) | p value |
|-----------------------------------|---------------|----------|-----------|---------|
| Intervention (basic vs control)   | -19.95        | -27.14   | -12.06    | <0.001  |
| Intervention (full vs basic)      | -30.99        | -38.42   | -22.67    | <0.001  |
| Institution (Children's hospital) | -18.44        | -26.38   | -9.64     | <0.001  |
| Institution (Hospital)            | 2.75          | -5.83    | 12.12     | 0.5453  |
| Experience (5-10y vs <5y)         | 1.85          | -11.10   | 16.69     | 0.7926  |
| Experience (>10y vs 5-10y)        | -2.43         | -16.02   | 13.36     | 0.7493  |
| User (partly vs no)               | -0.88         | -15.39   | 16.12     | 0.9133  |
| User (yes vs partly)              | -5.87         | -19.92   | 10.63     | 0.4666  |

**R summary output**

```
## Linear mixed model fit by REML. t-tests use Satterthwaite's method [
## lmerModLmerTest]
## Formula:
## log_time ~ intervention + institution + experience + user + (intervention |
##   subject) + (intervention | item)
##   Data: data_exploratory
##
## REML criterion at convergence: 653.6
##
## Scaled residuals:
##   Min      1Q  Median      3Q      Max
## -4.1903 -0.5998 -0.0537  0.5331  3.2470
##
## Random effects:
##   Groups   Name                Variance Std.Dev. Corr
##   subject (Intercept)          0.03751  0.1937
##           interventionbasic-control 0.03513  0.1874  0.10
##           interventionfull-basic    0.06151  0.2480  0.02 -0.47
##   item     (Intercept)          0.04184  0.2045
##           interventionbasic-control 0.01928  0.1388  0.01
##           interventionfull-basic    0.02960  0.1721 -0.76 -0.48
## Residual                        0.08292  0.2880
## Number of obs: 930, groups:  subject, 52; item, 18
##
## Fixed effects:
##              Estimate Std. Error      df t value Pr(>|t|)
## (Intercept)    4.842339   0.057639 30.008155  84.011 < 2e-16 ***
## interventionbasic-control -0.222575   0.048001 28.046824  -4.637 7.46e-05 ***
## interventionfull-basic   -0.370936   0.058103 30.941660  -6.384 4.17e-07 ***
## institution1    -0.203848   0.052280 44.997416  -3.899 0.000319 ***
## institution2     0.027128   0.044511 44.920751   0.609 0.545288
## experience5-10y-<5y    0.018346   0.069372 44.871124   0.264 0.792633
## experience>10y-5-10y -0.024608   0.076541 44.953549  -0.321 0.749324
## userpartly-no     -0.008842   0.080746 44.900724  -0.110 0.913292
## useryes-partly    -0.060522   0.082432 45.008740  -0.734 0.466626
## ---
```

Time (full model)

EXPLORATORY ANALYSIS

```
## Signif. codes:  0 '***' 0.001 '**' 0.01 '*' 0.05 '.' 0.1 ' ' 1
##
## Correlation of Fixed Effects:
##      (Intr) intrvntnb- intrvntnf- instt1 instt2 e5-10- e>10-5 usrpr-
## intrvntnbs-  0.030
## intrvntnfl- -0.439 -0.476
## institutin1 -0.083  0.001    -0.001
## institutin2 -0.075  0.000    0.000   -0.412
## expr5-10-<5  0.045 -0.001    0.000   -0.028 -0.312
## exp>10-5-10  0.073  0.000    0.000    0.158  0.035 -0.442
## userprtly-n  0.134  0.001    0.001   -0.292  0.200 -0.043 -0.046
## usry-sprtly -0.086 -0.002    0.001   -0.374  0.134  0.001  0.007 -0.467
```

**Plot - Predicted response time**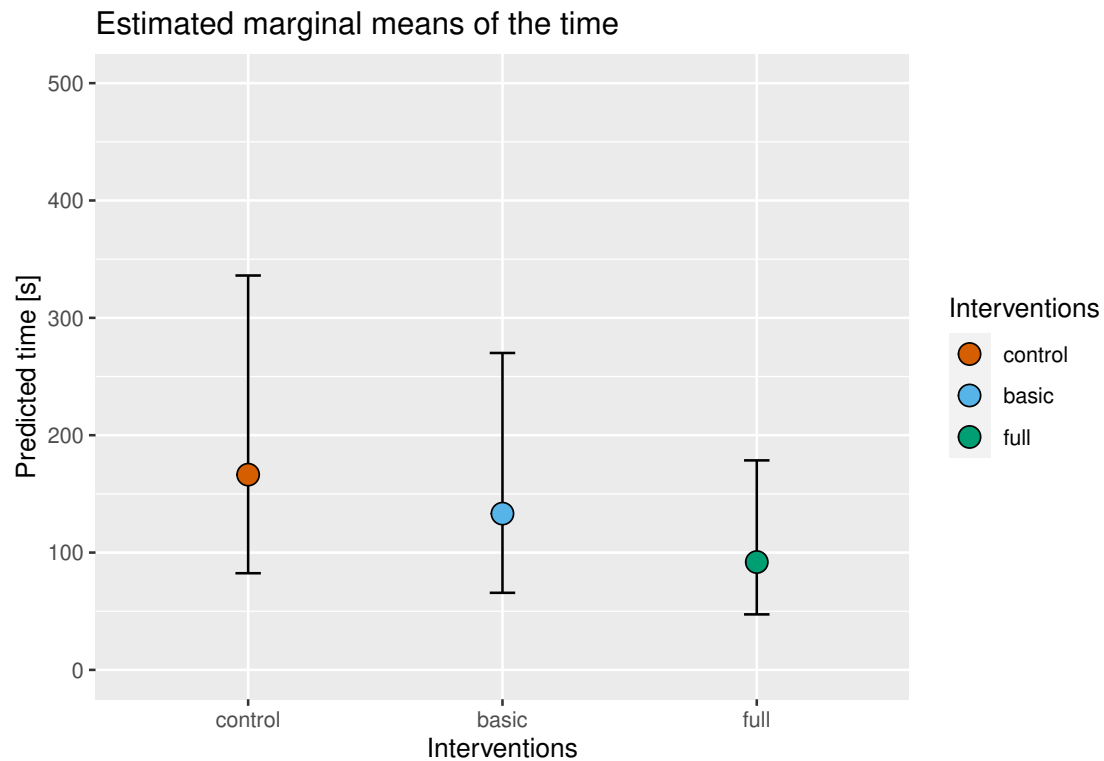

*Time (simple model)*

EXPLORATORY ANALYSIS

**Time (simple model)****Results**

| Variable                        | Deviation (%) | CI (low) | CI (high) | p value |
|---------------------------------|---------------|----------|-----------|---------|
| Intervention (basic vs control) | -19.93        | -24.01   | -15.62    | <0.001  |
| Intervention (full vs basic)    | -31.01        | -34.51   | -27.32    | <0.001  |

**R summary output**

```
## Linear mixed model fit by REML. t-tests use Satterthwaite's method [
## lmerModLmerTest]
## Formula: log_time ~ intervention + (1 | subject) + (1 | item)
## Data: data_exploratory
##
## REML criterion at convergence: 762.6
##
## Scaled residuals:
##   Min       1Q   Median       3Q      Max
## -3.7745 -0.6461 -0.0532  0.6139  3.7661
##
## Random effects:
## Groups Name          Variance Std.Dev.
## subject (Intercept) 0.06287  0.2507
## item    (Intercept) 0.04405  0.2099
## Residual                    0.10814  0.3288
## Number of obs: 930, groups:  subject, 52; item, 18
##
## Fixed effects:
##              Estimate Std. Error   df t value Pr(>|t|)
## (Intercept)      4.80288   0.06142 33.80208  78.194 < 2e-16 ***
## interventionbasic-control -0.22223   0.02671 861.13236  -8.319 3.45e-16 ***
## interventionfull-basic   -0.37118   0.02660 860.23224 -13.953 < 2e-16 ***
## ---
## Signif. codes:  0 '***' 0.001 '**' 0.01 '*' 0.05 '.' 0.1 ' ' 1
##
## Correlation of Fixed Effects:
##              (Intr) intrvntnb-
## intrvntnbs-  0.000
## intrvntnfl-  0.001 -0.495
```



Time (simple model)

EXPLORATORY ANALYSIS

Plot - Predicted response time

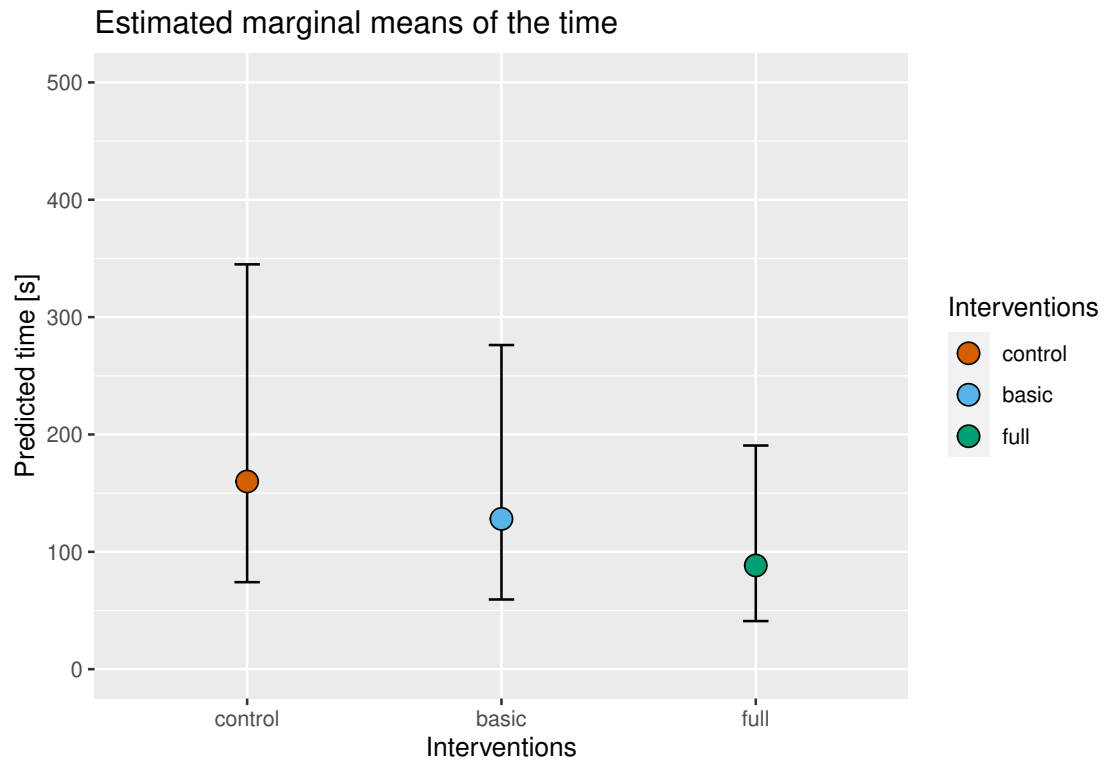

## Sensitivity analysis

## EXPLORATORY ANALYSIS

## Sensitivity analysis

## Results

| Variable                        | OR   | CI (low) | CI (high) | p value |
|---------------------------------|------|----------|-----------|---------|
| Intervention (basic vs control) | 0.67 | 0.44     | 1.03      | 0.0664  |
| Intervention (full vs basic)    | 0.22 | 0.12     | 0.42      | <0.001  |
| Order (block 2 vs block 1)      | 1.14 | 0.71     | 1.83      | 0.5822  |
| Order (block 3 vs block 1)      | 0.80 | 0.49     | 1.32      | 0.3783  |

## R summary output

```
## Generalized linear mixed model fit by maximum likelihood (Laplace
## Approximation) [glmerMod]
## Family: binomial ( logit )
## Formula: error ~ intervention + block_order + (1 | subject) + (1 | item)
## Data: data_exploratory
## Control: glmerControl(optimizer = "bobyqa")
##
##      AIC      BIC  logLik deviance df.resid
##  708.8   742.7  -347.4   694.8     925
##
## Scaled residuals:
##      Min       1Q   Median       3Q      Max
## -1.0778 -0.4245 -0.3108 -0.1725  6.5485
##
## Random effects:
## Groups Name          Variance Std.Dev.
## subject (Intercept) 0.2403   0.4902
## item (Intercept)    0.3724   0.6102
## Number of obs: 932, groups: subject, 52; item, 18
##
## Fixed effects:
##              Estimate Std. Error z value Pr(>|z|)
## (Intercept)      -2.1675     0.2493  -8.693 < 2e-16 ***
## interventionbasic-control -0.3950     0.2152  -1.835  0.0664 .
## interventionfull-basic  -1.4935     0.3173  -4.707 2.51e-06 ***
## block_order2         0.1327     0.2412   0.550  0.5822
## block_order3        -0.2238     0.2541  -0.881  0.3783
## ---
## Signif. codes:  0 '***' 0.001 '**' 0.01 '*' 0.05 '.' 0.1 ' ' 1
##
## Correlation of Fixed Effects:
##              (Intr) intrvntnb- intrvntnf- blk_2
## intrvntnbs-  0.049
## intrvntnfl-  0.212 -0.376
## block_ordr2 -0.497 -0.022      0.031
## block_ordr3 -0.466 -0.024      0.023      0.494
```

---

**CONTRASTS****Contrasts****Contrast matrices for categorical variables****Intervention (exploratory)**

```
##          basic-control full-basic
## control  -0.6666667 -0.3333333
## basic    0.3333333 -0.3333333
## full     0.3333333  0.6666667
```

**User**

```
##          partly-no yes-partly
## no      -0.6666667 -0.3333333
## partly  0.3333333 -0.3333333
## yes     0.3333333  0.6666667
```

**Experience**

```
##          5-10y-<5y >10y-5-10y
## <5y    -0.6666667 -0.3333333
## 5-10y  0.3333333 -0.3333333
## >10y   0.3333333  0.6666667
```

**Institution**

```
##          [,1] [,2]
## Children's hospital  1  0
## Hospital              0  1
## Community             -1 -1
```
